# Supplementary material
Source: PubMed Central journal article supplement (PMC6289881)
Supplement: NIHMS1505495-supplement-1.pdf [file NIHMS1505495-supplement-1.pdf]

**Table E1:** Description of maternal-child pairs included and excluded from analyses

| <b>Covariate</b>               | <b>Response</b>     | <b>Included<br/>N=673</b> | <b>Excluded<br/>N=585</b> | <b>p-value*</b> |
|--------------------------------|---------------------|---------------------------|---------------------------|-----------------|
| Maternal marital status        | Not Married         | 218 (32.4)                | 267 (45.6)                | <0.001          |
|                                | Married             | 455 (67.6)                | 318 (54.4)                |                 |
| Household income               | <\$20k              | 76 (11.3)                 | 106 (18.1)                | <0.001          |
|                                | 20-<\$40K           | 140 (20.8)                | 155 (26.5)                |                 |
|                                | 40K-<\$80K          | 179 (26.6)                | 168 (28.7)                |                 |
|                                | \$80K-<\$100K       | 92 (13.7)                 | 43 (7.4)                  |                 |
|                                | >=\$100K            | 97 (14.4)                 | 51 (8.7)                  |                 |
|                                | Refused to Answer   | 89 (13.2)                 | 62 (10.6)                 |                 |
| Maternal education             | <HS diploma         | 28 (4.2)                  | 46 (7.9)                  | <0.001          |
|                                | HS diploma          | 100 (14.9)                | 128 (21.9)                |                 |
|                                | Some college        | 304 (45.2)                | 301 (51.5)                |                 |
|                                | >=Bachelor's Degree | 241 (35.8)                | 110 (18.8)                |                 |
| Maternal race                  | White               | 176 (26.2)                | 114 (19.5)                | 0.002           |
|                                | African American    | 386 (57.4)                | 392 (67)                  |                 |
|                                | Other/Mixed         | 111 (16.5)                | 79 (13.5)                 |                 |
| Mother atopic†                 | No                  | 289 (42.9)                | 248 (48.1)                | 0.079           |
|                                | Yes                 | 384 (57.1)                | 268 (51.9)                |                 |
| Prenatal antibiotic use†       | No                  | 293 (45.4)                | 43 (43.9)                 | 0.78            |
|                                | Yes                 | 353 (54.6)                | 55 (56.1)                 |                 |
| Prenatal antifungal use†       | No                  | 526 (81.4)                | 78 (79.6)                 | 0.67            |
|                                | Yes                 | 120 (18.6)                | 20 (20.4)                 |                 |
| Indoor pets at pre-delivery    | No                  | 417 (62)                  | 403 (68.9)                | 0.010           |
|                                | Yes                 | 256 (38)                  | 182 (31.1)                |                 |
| Mode of delivery of offspring† | Vaginal             | 425 (63.2)                | 359 (62.1)                | 0.68            |
|                                | C-Section           | 247 (36.8)                | 219 (37.9)                |                 |

**Table E1:** Description of maternal-child pairs included and excluded from analyses

| <b>Covariate</b>                    | <b>Response</b> | <b>Included<br/>N=673</b> | <b>Excluded<br/>N=585</b> | <b>p-value*</b> |
|-------------------------------------|-----------------|---------------------------|---------------------------|-----------------|
| Current breastfeeding at 1 month†   | No              | 278 (42.8)                | 223 (60.4)                | <0.001          |
|                                     | Yes             | 372 (57.2)                | 146 (39.6)                |                 |
| Exclusive breastfeeding at 1 month† | No              | 542 (83.4)                | 340 (92.1)                | <0.001          |
|                                     | Yes             | 108 (16.6)                | 29 (7.9)                  |                 |

C-section, Cesarean section

HS, high school

\*Calculated by the chi-square test.

†Some missing values in covariate.

**Table E2:** Overall association between maternal atopy and childhood allergic outcomes

| <b>Outcome</b>       | <b>Non-Atopic<br/>Mother: N(%)</b> | <b>Atopic<br/>Mother: N(%)</b> | <b>OR (95% CI)*</b>            | <b>p-value</b> |
|----------------------|------------------------------------|--------------------------------|--------------------------------|----------------|
| Eczema               | 55 (19.6%)                         | 91 (24.5%)                     | 1.15 (0.75, 1.77) <sup>†</sup> | 0.51           |
| Atopy                | 84 (42.6%)                         | 165 (59.1%)                    | 2.35 (1.56, 3.53) <sup>†</sup> | <0.001         |
| Food sensitivity     | 69 (33.0%)                         | 139 (48.9%)                    | 2.20 (1.46, 3.31) <sup>†</sup> | <0.001         |
| Inhalant sensitivity | 34 (17.5%)                         | 82 (29.6%)                     | 2.04 (1.29, 3.24) <sup>‡</sup> | 0.002          |

OR, odds ratio

CI, confidence interval

\* odds of outcome in children of atopic versus non-atopic mothers.

<sup>†</sup> adjusted for maternal race.

<sup>‡</sup> adjusted for prenatal antibiotic use.
